# Supplementary material for: Links between the unfolded protein response and the DNA damage response in hypoxia: a systematic review
Source: PubMed Central journal article supplement (PMC8286837; doi:10.1042/bst20200861), 2021-05-18
Supplement: BST-49-1251-s1.pdf [file BST-49-1251-s1.pdf]

Table S1. **Eligibility criteria used to evaluate papers for inclusion or exclusion in review.**

Inclusion and exclusion criteria were determined based on the SPIDER framework.

|                               | <b>Inclusion criteria</b>                                                 | <b>Exclusion criteria</b>                                                                                                    |
|-------------------------------|---------------------------------------------------------------------------|------------------------------------------------------------------------------------------------------------------------------|
| <b>Sample</b>                 | Human cell model                                                          | Non-human cell model                                                                                                         |
| <b>Phenomenon of Interest</b> | Activation of DDR and/or UPR (proteins, genes, transcripts) under hypoxia | Study not relevant to UPR and/or DDR and/or hypoxia                                                                          |
| <b>Design</b>                 | Cell lines exposed to hypoxia at <2% O <sub>2</sub> concentration         | Cell lines not exposed to relevant oxygen concentration (>2% O <sub>2</sub> ); Exact oxygen concentration not reported       |
| <b>Evaluation</b>             | Link between UPR and DDR (alluded or explicit)                            | Inexplicit link between UPR and DDR; Pathways discussed separately in paper                                                  |
| <b>Research type</b>          | Empirical research                                                        | Secondary sources and non-empirical texts (i.e. review papers, textbook chapters, conference proceedings); Non-English texts |

Table S2. Papers identified from systematic review.

Following exclusion according to Table S1, 202 articles remained and were reviewed further

| Author                  | Year Published | Title                                                                                                                               | Journal                       | Oxygen Concentration (%) |   | Cell Line(s) Used              | Biological Molecule(s) Examined       |
|-------------------------|----------------|-------------------------------------------------------------------------------------------------------------------------------------|-------------------------------|--------------------------|---|--------------------------------|---------------------------------------|
| Cam, H. et al.          | 2010           | mTORC1 signaling under hypoxic conditions is controlled by ATM-dependent phosphorylation of HIF-1 $\alpha$                          | <i>Mol Cell</i>               | 0.2                      |   | HEK, ATM-deficient fibroblasts | mTOR, HIF, ATM, REDD1                 |
| Hegan, D. et al.        | 2010           | Inhibition of poly(ADP-ribose) polymerase down-regulates BRCA1 and RAD51 in a pathway mediated by E2F4 and p130                     | <i>Proc Natl Acad Sci USA</i> | 0.1                      |   | A549, RKO                      | PARP, BRCA1, RAD51, E2F4, p130        |
| Lou, J. et al.          | 2010           | Inhibition of hypoxia-inducible factor-1 $\alpha$ (HIF-1 $\alpha$ ) protein synthesis by DNA damage inducing agents                 | <i>PLoS One</i>               | 1                        |   | HEK                            | p53, HIF, eIF2 $\alpha$ , CDK         |
| Moehlenbrink, J. et al. | 2010           | Hypoxia suppresses chemotherapeutic drug-induced p53 Serine 46 phosphorylation by triggering HIPK2 degradation                      | <i>Cancer Let</i>             | 0.2                      | 2 | H1299, HepG2, MCF7, U2OS       | p53, HIPK2, Siah1                     |
| Pires, I. et al.        | 2010           | Exposure to acute hypoxia induces a transient DNA damage response which includes Chk1 and TLK1                                      | <i>Cell Cycle</i>             | 0.02                     |   | RKO                            | Chk1, TLK1, RAD51                     |
| Pires, I. M. et al.     | 2010           | Effects of acute versus chronic hypoxia on DNA damage responses and genomic instability                                             | <i>Cancer Res</i>             | <0.02                    |   | RKO, HCT116, U2OS              | E2F, MCF6, RPA, p53                   |
| Regazzetti, C. et al.   | 2010           | Insulin induces REDD1 expression through hypoxia-inducible factor 1 activation in adipocytes                                        | <i>J Biol Chem</i>            | 1                        |   | Human adipocytes (Biopredic)   | REDD1, mTOR, HIF, PI3K                |
| Ghosh, R. et al.        | 2010           | Transcriptional regulation of VEGF-A by the unfolded protein response pathway                                                       | <i>PLoS One</i>               | 0.5                      |   | HepG2                          | VEGFA, ATF6, IRE1/XBP1, PERK          |
| Lee, J. H. et al.       | 2010           | Retinoic acid and its binding protein modulate apoptotic signals in hypoxic hepatocellular carcinoma cells                          | <i>Cancer Lett</i>            | 1                        |   | Huh7, SNU-671                  | CRABP-II                              |
| Pereira, E. R. et al.   | 2010           | Transcriptional and post-transcriptional regulation of proangiogenic factors by the unfolded protein response                       | <i>PLoS One</i>               | 1                        |   | DAOY                           | VEGFA, FGF8, IL8, XBP1, ATF4          |
| Rouschop, K. et al.     | 2010           | The unfolded protein response protects human tumor cells during hypoxia through regulation of the autophagy genes MAP1LC3B and ATG5 | <i>J Clin Invest</i>          | <0.1                     |   | HCT116, U373                   | MAP1LC3B, ATG5, PERK, ATF4, CHOP      |
| Rzymiski, T. et al.     | 2010           | Regulation of autophagy by ATF4 in response to severe hypoxia                                                                       | <i>J Clin Invest</i>          | <0.1                     |   | MCF7                           | ATF4                                  |
| Yanagisawa, K. et al.   | 2010           | Novel metastasis-related gene CIM functions in the regulation of multiple cellular stress-response pathways                         | <i>Cancer Res</i>             | 0.5                      |   | NCI-H460, 293T                 | CIM, HIF1 $\alpha$ , OS-9, PHD, GRP78 |
| Papadakis, A. et al.    | 2010           | eIF2{ $\alpha$ } Kinase PKR modulates the hypoxic response by Stat3-dependent transcriptional suppression of HIF-1{ $\alpha$ }      | <i>Cancer Res</i>             | 1.0                      |   | H1299                          | PKR, STAT, HIF                        |
| Bouquet, F. et al.      | 2011           | A DNA-dependent stress response involving DNA-PK occurs in hypoxic cells and contributes to cellular adaptation to hypoxia          | <i>J Cell Sci</i>             | 0.1                      | 1 | HeLa, U87                      | DNA-PK, XCRR4 DNA ligase,             |
| Harding, S. et al.      | 2011           | ATM-dependent phosphorylation of 53BP1 in response to genomic stress in oxic and hypoxic cells                                      | <i>Radiother Oncol</i>        | 0.01                     |   | HCT116                         | 53BP1, p53                            |
| Lai, L. et al.          | 2011           | Down-regulation of NDRG1 promotes migration of cancer cells during reoxygenation                                                    | <i>PLoS One</i>               | 0.5                      |   | MCF7                           | NDRG1, HIF, c-MYC, n-MYC              |

|                            |      |                                                                                                                                                         |                                  |       |     |     |                                                                |                                           |
|----------------------------|------|---------------------------------------------------------------------------------------------------------------------------------------------------------|----------------------------------|-------|-----|-----|----------------------------------------------------------------|-------------------------------------------|
| Moon, S. et al.            | 2011 | The expression of human papillomavirus type 16 (HPV16 E7) induces cell cycle arrest and apoptosis in radiation and hypoxia resistant glioblastoma cells | <i>Mol Med Rep</i>               | 0     |     |     | U87MG                                                          | HPV16 E7, p53, Rb, E2F1                   |
| Ramaekers, C. et al.       | 2011 | Hypoxia disrupts the Fanconi anemia pathway and sensitizes cells to chemotherapy through regulation of UBE2T                                            | <i>Radiother Oncol</i>           | 0.02  |     |     | HT29, DU145, MCF7, MDA-MD-468, U373, HCT116, HeLa, ME180, SiHa | UBE2T, HIF, FANCD2                        |
| Butler, P. et al.          | 2011 | Unfolded protein response regulation in keloid cells                                                                                                    | <i>J Surg Res</i>                | <0.2  |     |     | Keloid and normal fibroblasts                                  | PERK, IRE1, ATF6                          |
| Fatma, N. et al.           | 2011 | Deficiency of Prdx6 in lens epithelial cells induces ER stress response-mediated impaired homeostasis and apoptosis                                     | <i>J Surg Res</i>                | 1     |     |     | Human lens (Lions Eye Bank)                                    | PRDX6, PERK, IRE1, ATF6                   |
| Roberts, H. et al.         | 2011 | Colon tumour cells increase PGE(2) by regulating COX-2 and 15-PGDH to promote survival during the microenvironmental stress of glucose deprivation      | <i>Carcinogenesis</i>            | 1     |     |     | HT29                                                           | PGE2, COX2, 15-PGDH, PI3K, AKT            |
| Tamama, K. et al.          | 2011 | Differential roles of hypoxia inducible factor subunits in multipotential stromal cells under hypoxic condition                                         | <i>J Cell Biochem</i>            | 1     |     |     | Bone marrow multipotential stromal cells (MSCs) (Lonza)        | HIF                                       |
| Wennemers, M. et al.       | 2011 | Tribbles homolog 3 denotes a poor prognosis in breast cancer and is involved in hypoxia response                                                        | <i>Breast Cancer Res</i>         | 0.1   |     |     | MDA-MB-231                                                     | TRIB3, PERK, CHOP, ATF4                   |
| Brockmeier, U. et al.      | 2011 | The function of hypoxia-inducible factor (HIF) is independent of the endoplasmic reticulum protein OS-9                                                 | <i>PLoS One</i>                  | 1     |     |     | U2OS, HEK293, HEK293T, HeLa, MC-7, UT7, Hep3B                  | OS-9, HIF, PHD2, PHD3                     |
| Miyamoto, N. et al.        | 2011 | Transcriptional regulation of activating transcription factor 4 under oxidative stress in retinal pigment epithelial ARPE-19/HPV-16 cells               | <i>Invest Ophthalmol Vis Sci</i> | 0     |     |     | ARPE-19/HPV-16                                                 | ATF4, NRF2                                |
| Van den Beucken, T. et al. | 2011 | Translational control is a major contributor to hypoxia induced gene expression                                                                         | <i>Radiother Oncol</i>           | <0.02 |     |     | DU145                                                          | PERK, eIF2 $\alpha$ , mTOR, 4E-BP1, EIF4F |
| Hamidi, T. et al.          | 2012 | Nupr1-aurora kinase A pathway provides protection against metabolic stress-mediated autophagic-associated cell death                                    | <i>Clin Cancer Res</i>           | 0.2   |     |     | MiaPaca2                                                       | Nupr1, Aurka                              |
| Kumareswaran, R. et al.    | 2012 | Chronic hypoxia compromises repair of DNA double-strand breaks to drive genetic instability                                                             | <i>J Cell Sci</i>                | 0     | 0.2 |     | GM05757                                                        | gH2AX, 53BP1, ATM                         |
| Leontieva, O. et al.       | 2012 | Hypoxia suppresses conversion from proliferative arrest to cellular senescence                                                                          | <i>Proc Natl Acad Sci U S A</i>  | 0.2   |     |     | MEL10                                                          | mTOR, p21, p53, nutlin-3a                 |
| Perez, M. et al.           | 2012 | Mutual regulation between SIAH2 and DYRK2 controls hypoxic and genotoxic signaling pathways                                                             | <i>J Mol Cell Biol</i>           | 1     |     |     | U2OS, HeLa, H1299                                              | SIAH2, DYRK2,                             |
| Pires, I. M. et al.        | 2012 | Targeting radiation-resistant hypoxic tumour cells through ATR inhibition                                                                               | <i>Br J Cancer</i>               | <0.02 |     |     | RKO, HCT116, DLD1                                              | ATR, H2AX, KAP1                           |
| Sermes, A. et al.          | 2012 | Hypoxia-induced modulation of apoptosis and BCL-2 family proteins in different cancer cell types                                                        | <i>PLoS One</i>                  | 1     |     |     | HepG2, A549, MDA-MB231, Hep3B, U2OS, HT-29, PC-3               | BCL2, NOXA, BAD, p53                      |
| Urano, M. et al.           | 2012 | The effect of DN (dominant-negative) Ku70 and reoxygenation on hypoxia cell-kill: evidence of hypoxia-induced potentially lethal damage                 | <i>Int J Radiat Biol</i>         | 0     | 0.1 | 0.5 | HCT8, HT29                                                     | Ku70,                                     |
| Xie, Y. et al.             | 2012 | Sirt1 regulates radiosensitivity of hepatoma cells differently under normoxic and hypoxic conditions                                                    | <i>Cancer Sci</i>                | 1     |     |     | HepG2, SK-Hep-1                                                | SIRT1, CMYC, P53                          |

|                               |      |                                                                                                                                                                                                                                                       |                            |      |       |   |                                   |                                                                                   |
|-------------------------------|------|-------------------------------------------------------------------------------------------------------------------------------------------------------------------------------------------------------------------------------------------------------|----------------------------|------|-------|---|-----------------------------------|-----------------------------------------------------------------------------------|
| Zhang, T. et al.              | 2012 | Silencing thioredoxin induces liver cancer cell senescence under hypoxia                                                                                                                                                                              | <i>Hepatol Res</i>         | 1    |       |   | MHCC97H                           | TXN, p53                                                                          |
| Bouvier, N. et al.            | 2012 | The unfolded protein response regulates an angiogenic response by the kidney epithelium during ischemic stress                                                                                                                                        | <i>J Biol Chem</i>         | 0.1  |       |   | HK-2                              | VEGFA, bFGF, ANG, HIF1 $\alpha$ , PERK, IRE1, ATF6                                |
| Elanchezian, R. et al.        | 2012 | Low glucose under hypoxic conditions induces unfolded protein response and produces reactive oxygen species in lens epithelial cells                                                                                                                  | <i>Cell Death Dis</i>      | 1    | <0.14 |   | SRA 01/04                         | Nrf2, PERK                                                                        |
| Munksgaard Persson, M. et al. | 2012 | HIF-2 $\alpha$ expression is suppressed in SCLC cells, which survive in moderate and severe hypoxia when HIF-1 $\alpha$ is repressed                                                                                                                  | <i>Cell Death Dis</i>      | 1    | 0     |   | U1690, U1906, U2020, U1285, U1568 | HIF2 $\alpha$ , XBP1                                                              |
| Rzymiski, T. et al.           | 2012 | The unfolded protein response controls induction and activation of ADAM17/TACE by severe hypoxia and ER stress                                                                                                                                        | <i>Oncogene</i>            | 0    | <0.1  |   | HeLa, HEF, HEK293, U87, MCF7      | ADAM17/TACE, TNF $\alpha$ , TNFR, HIF1 $\alpha$ , PERK/eIF2 $\alpha$ /ATF4, ATF6, |
| Tang, X. et al.               | 2012 | Functional interaction between responses to lactic acidosis and hypoxia regulates genomic transcriptional outputs                                                                                                                                     | <i>Cancer Res</i>          | 1    |       |   | MCF7                              | ATF4                                                                              |
| Yu, S. J. et al.              | 2012 | Enhancement of hexokinase II inhibitor-induced apoptosis in hepatocellular carcinoma cells via augmenting ER stress and anti-angiogenesis by protein disulfide isomerase inhibition                                                                   | <i>J Bioenerg Biomembr</i> | 1    |       |   | Huh7, SNU-761                     | Hypoxic induction of PDI                                                          |
| Ding, G. et al.               | 2013 | HIF1-regulated ATRIP expression is required for hypoxia induced ATR activation                                                                                                                                                                        | <i>FEBS Lett</i>           | 0.1  |       |   | HeLa, MCF7, HepG2, 293T           | ATRIP                                                                             |
| Fallone, F. et al.            | 2013 | ATR controls cellular adaptation to hypoxia through positive regulation of hypoxia-inducible factor 1 (HIF-1) expression                                                                                                                              | <i>Oncogene</i>            | 0.1  |       |   | U20S                              | ATM, DNA-PK, ATR, CHK1                                                            |
| Hasvold, G. et al.            | 2013 | The efficacy of CHK1 inhibitors is not altered by hypoxia, but is enhanced after reoxygenation                                                                                                                                                        | <i>Mol Cancer Ther</i>     | 0.02 | 0.2   | 1 | U20S, HCT116                      | CHK1, $\gamma$ H2AX                                                               |
| Olcina, M. et al.             | 2013 | Replication stress and chromatin context link ATM activation to a role in DNA replication                                                                                                                                                             | <i>Mol Cell</i>            | 0.1  |       |   | RKO                               | ATM                                                                               |
| Pan, J. et al.                | 2013 | A kinome-wide siRNA screen identifies multiple roles for protein kinases in hypoxic stress adaptation, including roles for IRAK4 and GAK in protection against apoptosis in VHL-/- renal carcinoma cells, despite activation of the NF-kappaB pathway | <i>J Biomol Screen</i>     | 0.3  |       |   | SW480                             | IRAK4, GAK, NF- $\kappa$ B                                                        |
| Selvakumaran, M. et al.       | 2013 | Autophagy inhibition sensitizes colon cancer cells to antiangiogenic and cytotoxic therapy                                                                                                                                                            | <i>Clin Cancer Res</i>     | 0.1  |       |   | HT29, HCT116, HCT15, SW620, KM12  | Beclin1, LC3, p62, ATG5                                                           |
| Sermeus, A. et al.            | 2013 | Differential effect of hypoxia on etoposide-induced DNA damage response and p53 regulation in different cell types                                                                                                                                    | <i>J Cell Physiol</i>      | 1    |       |   | HEPG2, A549                       | p53, CHK2, H2AX                                                                   |
| Storci, G. et al.             | 2013 | Slug/beta-catenin-dependent proinflammatory phenotype in hypoxic breast cancer stem cells                                                                                                                                                             | <i>Am J Pathol</i>         | 1    |       |   | MCF7                              | Slug/ $\beta$ -catenin, TNF, IL8                                                  |
| Tong, Y. et al.               | 2013 | HIF1 regulates WSB-1 expression to promote hypoxia-induced chemoresistance in hepatocellular carcinoma cells                                                                                                                                          | <i>FEBS Lett</i>           | 1    |       |   | HepG2                             | WSB-1, HIPK2                                                                      |
| Wrann, S. et al.              | 2013 | HIF mediated and DNA damage independent histone H2AX phosphorylation in chronic hypoxia                                                                                                                                                               | <i>Biol Chem</i>           | 0.2  |       |   | HEK                               | H2AX, HIF1, HIF2                                                                  |

|                        |      |                                                                                                                                                                  |                                  |       |      |                                                                        |                                                                 |
|------------------------|------|------------------------------------------------------------------------------------------------------------------------------------------------------------------|----------------------------------|-------|------|------------------------------------------------------------------------|-----------------------------------------------------------------|
| Zhu, Y. et al.         | 2013 | Involvement of decreased hypoxia-inducible factor 1 activity and resultant G1-S cell cycle transition in radioresistance of perinecrotic tumor cells             | <i>Oncogene</i>                  | <0.02 |      | HEK, HeLa                                                              | HIF, p27                                                        |
| Blaustein, M. et al.   | 2013 | Modulation of the Akt pathway reveals a novel link with PERK/eIF2alpha, which is relevant during hypoxia                                                         | <i>Oncogene</i>                  | <0.1  |      | HEK293T                                                                | Akt, PERK                                                       |
| Chiang, C. K. et al.   | 2013 | Endoplasmic reticulum stress signal impairs erythropoietin production: a role for ATF4                                                                           | <i>Am J Physiol Cell Physiol</i> | 1     |      | HepG2                                                                  | HIF1a, ATF4, EPO, GRP78                                         |
| Cojocari, D. et al.    | 2013 | New small molecule inhibitors of UPR activation demonstrate that PERK, but not IRE1alpha signaling is essential for promoting adaptation and survival to hypoxia | <i>Radiother Oncol</i>           | 0.2   |      | KP4, HCT116                                                            | PERK, IRE1                                                      |
| Grkovic, S. et al.     | 2013 | IGFBP-3 binds GRP78, stimulates autophagy and promotes the survival of breast cancer cells exposed to adverse microenvironments                                  | <i>Oncogene</i>                  | 1     |      | MCF7                                                                   | IGFBP-3, GRP78                                                  |
| Mellor, P. et al.      | 2013 | CREB3L1 is a metastasis suppressor that represses expression of genes regulating metastasis, invasion, and angiogenesis                                          | <i>Mol Cell Biol</i>             | 1     |      | MCF7, MDA-MB-435                                                       | CREB3L1                                                         |
| Mujcic, H. et al.      | 2013 | Hypoxic activation of the PERK/eIF2alpha arm of the unfolded protein response promotes metastasis through induction of LAMP3                                     | <i>Clin Cancer Res</i>           | 0     |      | ME180                                                                  | LAMP3, PERK/eIF2α                                               |
| Nagelkerke, A. et al.  | 2013 | Hypoxia stimulates migration of breast cancer cells via the PERK/ATF4/LAMP3-arm of the unfolded protein response                                                 | <i>Breast Cancer Res</i>         | 1     |      | MDA-MB-231                                                             | PERK/ATF4/LAMP3                                                 |
| Rouschop, K. et al.    | 2013 | PERK/eIF2alpha signaling protects therapy resistant hypoxic cells through induction of glutathione synthesis and protection against ROS                          | <i>Proc Natl Acad Sci U S A</i>  | <0.02 | <0.2 | U373                                                                   | PERK/eIF2α, HIF1                                                |
| Schaaf, M. et al.      | 2013 | The autophagy associated gene, ULK1, promotes tolerance to chronic and acute hypoxia                                                                             | <i>Radiother Oncol</i>           | <0.02 | <0.2 | Primary human head and neck squamous cell carcinoma (HNSCC) xenografts | ULK1                                                            |
| Zhang, H. et al.       | 2013 | Effects of hypoxia on the proliferation, mineralization and ultrastructure of human periodontal ligament fibroblasts in vitro                                    | <i>Exp Ther Med</i>              | 1     | 2    | Human periodontal ligament fibroblasts (HPLFs) (donors)                | Alkaline phosphatase (ALP)                                      |
| Koritzinsky, M. et al. | 2013 | Two phases of disulfide bond formation have differing requirements for oxygen                                                                                    | <i>J Cell Biol</i>               | 0     |      | HepG2, HCT116, HeLa                                                    | -                                                               |
| Askautrud, H. et al.   | 2014 | Global gene expression analysis reveals a link between NDRG1 and vesicle transport                                                                               | <i>PLoS One</i>                  | 1     |      | ME16C2, SUM102                                                         | NDRG1                                                           |
| Chan, N. et al.        | 2014 | Hypoxia provokes base excision repair changes and a repair-deficient, mutator phenotype in colorectal cancer cells                                               | <i>Mol Cancer Res</i>            | 0.2   |      | RKO                                                                    | MYH, OGG1, MTH1, APE1, PCNA, POLD, FEN1, DNA POLB, and RPA      |
| Chen, L. et al.        | 2014 | Jumonji domain-containing protein 2B silencing induces DNA damage response via STAT3 pathway in colorectal cancer                                                | <i>Br J Cancer</i>               | 1     |      | CRC                                                                    | STAT3, JMJD2B                                                   |
| Kilic Eren, M. et al.  | 2014 | The role of hypoxia inducible factor-1 alpha in bypassing oncogene-induced senescence                                                                            | <i>PLoS One</i>                  | 1     |      | IMR-90, BJ                                                             | RasV12, p53, p21 <sup>CIP1</sup> and p16 <sup>INK4a</sup> , HIF |

|                     |      |                                                                                                                                                                                                              |                                |      |   |                                                   |                                                                      |
|---------------------|------|--------------------------------------------------------------------------------------------------------------------------------------------------------------------------------------------------------------|--------------------------------|------|---|---------------------------------------------------|----------------------------------------------------------------------|
| Possik, P. et al.   | 2014 | Parallel in vivo and in vitro melanoma RNAi dropout screens reveal synthetic lethality between hypoxia and DNA damage response inhibition                                                                    | <i>Cell Rep</i>                | 1.0  |   | Human melanoma xenografts                         | CHEK1, CHEK2, ATM                                                    |
| Raz, S. et al.      | 2014 | Severe hypoxia induces complete antifolate resistance in carcinoma cells due to cell cycle arrest                                                                                                            | <i>Cell Death Dis</i>          | 0.1  |   | DLD1, HCT116                                      | -                                                                    |
| Scanlon, S. et al.  | 2014 | Hypoxic stress facilitates acute activation and chronic downregulation of fanconi anemia proteins                                                                                                            | <i>Mol Cancer Res</i>          | 0.1  | 1 | HeLa, A549, MCF7                                  | FANCD2, FANCI, $\gamma$ H2AX, BRCA1 and RAD51                        |
| Wang, Y. et al.     | 2014 | Gemcitabine induces poly (ADP-ribose) polymerase-1 (PARP-1) degradation through autophagy in pancreatic cancer                                                                                               | <i>PLoS One</i>                |      | 1 | KLM1                                              | PARP, MEK, ERK, LC3                                                  |
| Wu, M. et al.       | 2014 | Dynamic regulation of Rad51 by E2F1 and p53 in prostate cancer cells upon drug-induced DNA damage under hypoxia                                                                                              | <i>Mol Pharmacol</i>           | 0.2  |   | PC3, DU145, LNCaP, Vcap                           | RAD51, p53, E2F1                                                     |
| Zhang, L. et al.    | 2014 | Inhibition of KAP1 enhances hypoxia-induced Kaposi's sarcoma-associated herpesvirus reactivation through RBP-Jkappa                                                                                          | <i>J Virol</i>                 |      | 1 | Primary effusion lymphoma (PEL), HEK293           | KAP1, HIF1 $\alpha$ , Kaposi's sarcoma-associated herpesvirus (KSHV) |
| Chen, X. et al.     | 2014 | XBP1 promotes triple-negative breast cancer by controlling the HIF1 $\alpha$ pathway                                                                                                                         | <i>Nature</i>                  | 0.1  |   | Triple negative breast cancer, MDA-MB-231, Hs578T | XBP1, HIF1 $\alpha$                                                  |
| Lee, D. et al.      | 2014 | Hyperoxia resensitizes chemoresistant glioblastoma cells to temozolomide through unfolded protein response                                                                                                   | <i>Anticancer Res</i>          |      | 1 | U87, U251                                         | P4HB                                                                 |
| Pereira, E. et al.  | 2014 | Endoplasmic reticulum (ER) stress and hypoxia response pathways interact to potentiate hypoxia-inducible factor 1 (HIF-1) transcriptional activity on targets like vascular endothelial growth factor (VEGF) | <i>J Biol Chem</i>             |      | 1 | NB1691                                            | HIF1, VEGF, ATF4                                                     |
| Pi, L. et al.       | 2014 | Knockdown of glucose-regulated protein 78 abrogates chemoresistance of hypopharyngeal carcinoma cells to cisplatin induced by unfolded protein in response to severe hypoxia                                 | <i>Oncol Lett</i>              | <0.1 | 1 | FaDu                                              | GRP78                                                                |
| Vlaminck, B. et al. | 2014 | Effects of copper sulfate-oxidized or myeloperoxidase-modified LDL on lipid loading and programmed cell death in macrophages under hypoxia                                                                   | <i>Hypoxia (Auckl)</i>         |      | 1 | Macrophages                                       | -                                                                    |
| Jeong, K. et al.    | 2014 | Cyclophilin B is involved in p300-mediated degradation of CHOP in tumor cell adaptation to hypoxia                                                                                                           | <i>Cell Death Differ</i>       | 0.1  |   | HeLa, HEK293, AGS                                 | CypB, CHOP, p300, ATF6                                               |
| Adam, M. et al.     | 2015 | SIAH ubiquitin ligases regulate breast cancer cell migration and invasion independent of the oxygen status                                                                                                   | <i>Cell Cycle</i>              |      | 1 | MCF7                                              | SIAH, p27                                                            |
| Allen, C. et al.    | 2015 | DNA Damage Response Proteins and Oxygen Modulate Prostaglandin E2 Growth Factor Release in Response to Low and High LET Ionizing Radiation                                                                   | <i>Front Oncol</i>             | 1.0  |   | HeLa, HT1080, HCT116, MCF7, BJ1hTERT              | PGE2, COX1-2                                                         |
| Bigot, N. et al.    | 2015 | ING1b negatively regulates HIF1 $\alpha$ protein levels in adipose-derived stromal cells by a SUMOylation-dependent mechanism                                                                                | <i>Cell Death Dis</i>          |      | 1 | Human adipocyte tissue samples, U2OS              | ING1b, PIAS4                                                         |
| Bigot, N. et al.    | 2015 | Hypoxia Differentially Modulates the Genomic Stability of Clinical-Grade ADSCs and BM-MSCs in Long-Term Culture                                                                                              | <i>Int J Biochem Cell Biol</i> |      | 1 | Human adipocyte tissue samples                    | Ku80, TP53BP1, BRCA1, and RAD51                                      |
| Kuo, Y. et al.      | 2015 | Nijmegen breakage syndrome protein 1 (NBS1) modulates hypoxia inducible factor-1 $\alpha$ (HIF-1 $\alpha$ )                                                                                                  | <i>Int J Biochem Cell Biol</i> |      | 1 | MDA-MB-231                                        | MRE11-RAD50-NBS1                                                     |

|                         |      |                                                                                                                                                                                                   |                                 |       |                                                                                            |                                                     |                                     |
|-------------------------|------|---------------------------------------------------------------------------------------------------------------------------------------------------------------------------------------------------|---------------------------------|-------|--------------------------------------------------------------------------------------------|-----------------------------------------------------|-------------------------------------|
|                         |      | stability and promotes in vitro migration and invasion under ionizing radiation                                                                                                                   |                                 |       |                                                                                            |                                                     |                                     |
| Leszczynska, K. et al.  | 2015 | Hypoxia-induced p53 modulates both apoptosis and radiosensitivity via AKT                                                                                                                         | <i>J Clin Invest</i>            | <0.1  | H1299                                                                                      | p53, AKT, INPP5D, PHLDA3                            |                                     |
| Liu, Y. et al.          | 2015 | Hypoxia induced HMGB1 and mitochondrial DNA interactions mediate tumor growth in hepatocellular carcinoma through Toll-like receptor 9                                                            | <i>J Hepatol</i>                | 1     | Hepa1-6, Huh7                                                                              | HMGB1, TLR9                                         |                                     |
| Shi, S. et al.          | 2015 | Resistance of SMMC-7721 hepatoma cells to etoposide in hypoxia is reversed by VEGF inhibitor                                                                                                      | <i>Mol Med Rep</i>              | 0.6   | SMMC-7721                                                                                  | VEGF, Bcl-2, procaspase 3, cyclin B1 and Cdc2, NFKB |                                     |
| Thurmond, P. et al.     | 2015 | Structural modifications of the prostate in hypoxia, oxidative stress, and chronic ischemia                                                                                                       | <i>Korean J Urol</i>            | 2     | Human prostate smooth muscle cells (SMCs), epithelial cells (ECs), and stromal cells (SCs) | Oxidate damage markers                              |                                     |
| Vasilevskaya, I. et al. | 2015 | Inhibition of JNK Sensitizes Hypoxic Colon Cancer Cells to DNA-Damaging Agents                                                                                                                    | <i>Clin Cancer Res</i>          | 0.05  | HT29                                                                                       | JNK                                                 |                                     |
| Chatterjee, N. et al.   | 2015 | Environmental stress induces trinucleotide repeat mutagenesis in human cells                                                                                                                      | <i>Proc Natl Acad Sci U S A</i> | 1.0   | HEK293                                                                                     | HIF1, DHFR (rereplication gene)                     |                                     |
| Bartkowiak, K. et al.   | 2015 | Disseminated Tumor Cells Persist in the Bone Marrow of Breast Cancer Patients through Sustained Activation of the Unfolded Protein Response                                                       | <i>Cancer Res</i>               | 1     | BC-M1, LC-M1, PC-E1, MCF-7, Hs578t, MDA-MB-231, MDA-MB-468                                 | GRP78                                               |                                     |
| Han, K. S. et al.       | 2015 | Inhibition of endoplasmic reticulum chaperone protein glucose-regulated protein 78 potentiates anti-angiogenic therapy in renal cell carcinoma through inactivation of the PERK/eIF2alpha pathway | <i>Oncotarget</i>               | 1     | Caki-1, Caki-2                                                                             | GRP78, eIF2a                                        |                                     |
| Hotokezaka, Y. et al.   | 2015 | GSK-3beta-dependent downregulation of gamma-taxilin and alphaNAC merge to regulate ER stress responses                                                                                            | <i>Cell Death Dis</i>           | 1     | HeLa                                                                                       | GSK-3B, $\gamma$ -taxilin, $\alpha$ NAC             |                                     |
| Koizume, S. et al.      | 2015 | Lipid starvation and hypoxia synergistically activate ICAM1 and multiple genes in an Sp1-dependent manner to promote the growth of ovarian cancer                                                 | <i>Mol Cancer</i>               | 1     | Human ovarian cancer tissue samples                                                        | ICAM1, Sp1, HIF1a, mTOR, TNFa-NFKB                  |                                     |
| Nagelkerke, A. et al.   | 2015 | Hypoxic regulation of the PERK/ATF4/LAMP3-arm of the unfolded protein response in head and neck squamous cell carcinoma                                                                           | <i>Head Neck</i>                | <0.1  | UT-SCC                                                                                     | PERK/eIF2a/ATF4/LAMP3                               |                                     |
| Notte, A. et al.        | 2015 | Taxol-induced unfolded protein response activation in breast cancer cells exposed to hypoxia: ATF4 activation regulates autophagy and inhibits apoptosis                                          | <i>Int J Biochem Cell Biol</i>  | 1     | MDA-MB-231, T47D                                                                           | ATF4, PERK, ATF6, IRE1                              |                                     |
| Shen, X. et al.         | 2015 | The unfolded protein response potentiates epithelial-to-mesenchymal transition (EMT) of gastric cancer cells under severe hypoxic conditions                                                      | <i>Med Oncol</i>                | 0.1   | 1                                                                                          | HGC27, MGC803                                       | PERK, ATF4, ATF6, TGF $\beta$ , Akt |
| Vandewynckel, Y. et al. | 2015 | Modulation of the unfolded protein response impedes tumor cell adaptation to proteotoxic stress: a PERK for hepatocellular carcinoma therapy                                                      | <i>Hepatol Int</i>              | 1     | HepG2, BWTG3, Hepa1-6                                                                      | PERK, IRE1, CHOP, ATF6                              |                                     |
| Verras, M. et al.       | 2015 | WNT16-expressing Acute Lymphoblastic Leukemia Cells are Sensitive to Autophagy Inhibitors after ER Stress Induction                                                                               | <i>Anticancer Res</i>           | <0.01 | RKO                                                                                        | WNT-16                                              |                                     |
| Zheng, X. et al.        | 2015 | Attenuation of oxygen fluctuation-induced endoplasmic reticulum stress in human lens epithelial cells                                                                                             | <i>Exp Ther Med</i>             | 0     | 1                                                                                          | hLECs                                               | Nrf2, Keap1                         |

|                              |      |                                                                                                                                                     |                                     |     |                                             |                              |                   |
|------------------------------|------|-----------------------------------------------------------------------------------------------------------------------------------------------------|-------------------------------------|-----|---------------------------------------------|------------------------------|-------------------|
| Zhang, N. et al.             | 2015 | Hypoxia-induced autophagy promotes human prostate stromal cells survival and ER-stress                                                              | <i>Biochem Biophys Res Commun</i>   | 1.0 | WPMY-1                                      | CHOP                         |                   |
| Bi, X. et al.                | 2015 | Acetylcholine ameliorates endoplasmic reticulum stress in endothelial cells after hypoxia/reoxygenation via M3 AChR-AMPK signaling                  | <i>Cell Cycle</i>                   | 1   | HUVEC                                       | Acetylcholine                |                   |
| Jeong, K. et al.             | 2015 | Hypoxia induces cyclophilin B through the activation of transcription factor 6 in gastric adenocarcinoma cells                                      | <i>Oncol Lett</i>                   | 0.1 | AGS                                         | CypB, ATF6                   |                   |
| Kukita, K. et al.            | 2015 | Cancer-Associated Oxidase ERO1-alpha Regulates the Expression of MHC Class I Molecule via Oxidative Folding                                         | <i>J Immunol</i>                    | 1.0 | SW480, MCF-7, MIAPaCa2, HCT15, HCT116, HT29 | ERO1 $\alpha$ , PDI          |                   |
| Burrows, N. et al.           | 2016 | Phosphatidylinositide 3-kinase (PI3K) and PI3K-related kinase (PIKK) activity contributes to radioresistance in thyroid carcinomas                  | <i>Oncotarget</i>                   | 0   | FTC-133, 8505c                              | PI3K, PIKK, ATM, ATR         |                   |
| Di, K. et al.                | 2016 | Mitochondrial Lon is over-expressed in high-grade gliomas, and mediates hypoxic adaptation: potential role of Lon as a therapeutic target in glioma | <i>Oncotarget</i>                   | 1   | U-251                                       | Mitochondrial Lon            |                   |
| Dukel, M. et al.             | 2016 | The Breast Cancer Tumor Suppressor TRIM29 Is Expressed via ATM-dependent Signaling in Response to Hypoxia                                           | <i>J Biol Chem</i>                  | 1   | SKBr3, MDA-MB-468                           | TRIM29, ATM                  |                   |
| Feng, H. et al.              | 2016 | Hypoxia-induced autophagy as an additional mechanism in human osteosarcoma radioresistance                                                          | <i>J Bone Oncol</i>                 | 1   | Human osteosarcoma tissue samples           | LC3, HIF, ROS                |                   |
| Garcia-Limones, C. et al.    | 2016 | CHK2 stability is regulated by the E3 ubiquitin ligase SIAH2                                                                                        | <i>Oncogene</i>                     | 1   | HEK-293T, HeLa, U2OS, A549                  | CHK2, SIAH2                  |                   |
| Hasvold, G. et al.           | 2016 | Hypoxia-induced alterations of G2 checkpoint regulators                                                                                             | <i>Mol Oncol</i>                    | 0.2 | U2OS                                        | CDK                          |                   |
| Janaszak-Jasiecka, A. et al. | 2016 | miR-429 regulates the transition between Hypoxia-Inducible Factor (HIF)1A and HIF3A expression in human endothelial cells                           | <i>Sci Rep</i>                      | 1   | HUVEC                                       | HIF1A, HIF3A, mir-429, DDIT4 |                   |
| Jiang, Y. et al.             | 2016 | Hypoxia Potentiates the Radiation-Sensitizing Effect of Olaparib in Human Non-Small Cell Lung Cancer Xenografts by Contextual Synthetic Lethality   | <i>Int J Radiat Oncol Biol Phys</i> | 1   | NSCLC Calu-6, Calu-3                        | PARP, $\gamma$ H2AX, RAD51   |                   |
| Liu, S. et al.               | 2016 | Intermittent hypoxia reduces microglia proliferation and induces DNA damage in vitro                                                                | <i>Iran J Basic Med Sci</i>         | 1   | BV2                                         | Cyclin D1, cyclin E2, p53    |                   |
| Ma, D. et al.                | 2016 | GADD45beta induction by S-adenosylmethionine inhibits hepatocellular carcinoma cell proliferation during acute ischemia-hypoxia                     | <i>Oncotarget</i>                   | 1   | HepG2, Hep3B                                | GADD45 $\beta$               |                   |
| Memon, D. et al.             | 2016 | Hypoxia-driven splicing into noncoding isoforms regulates the DNA damage response                                                                   | <i>NPJ Genom Med</i>                | 1   | HCT116                                      | HDAC6, TP53BP1               |                   |
| Olcina, M. et al.            | 2016 | H3K9me3 facilitates hypoxia-induced p53-dependent apoptosis through repression of APAK                                                              | <i>Oncogene</i>                     | 0.1 | 1                                           | RKO                          | SETDB1, APAK, P53 |
| Wen, L. et al.               | 2016 | Regulation of Multi-drug Resistance in hepatocellular carcinoma cells is TRPC6/Calcium Dependent                                                    | <i>Sci Rep</i>                      | 1   | Huh7, HepG2                                 | TRPC6, STAT3                 |                   |
| Yu, Z. et al.                | 2016 | Tumor-Derived Factors and Reduced p53 Promote Endothelial Cell Centrosome Over-Duplication                                                          | <i>PLoS One</i>                     | 2   | HUVEC                                       | p53, BMP proteins, SMAD, IL8 |                   |
| Zhou, F. et al.              | 2016 | Regulation of hypoxia-inducible factor-1alpha, regulated in development and DNA damage response-1 and                                               | <i>Placenta</i>                     | 1   | BeWo                                        | HIF-1 $\alpha$ -REDD1-mTOR   |                   |



|                            |      |                                                                                                                                                    |                                   |     |                                        |                                           |            |
|----------------------------|------|----------------------------------------------------------------------------------------------------------------------------------------------------|-----------------------------------|-----|----------------------------------------|-------------------------------------------|------------|
|                            |      | mammalian target of rapamycin in human placental BeWo cells under hypoxia                                                                          |                                   |     |                                        |                                           |            |
| Chang, E. et al.           | 2016 | Heterogenous ribonucleoprotein A18 (hnRNP A18) promotes tumor growth by increasing protein translation of selected transcripts in cancer cells     | <i>Oncotarget</i>                 | 0.5 | HEMa-LP, MDA-MB-231                    | A18, ATR, RPA, TRX, HIF-1 $\alpha$        |            |
| Leszczynska, K. et al.     | 2016 | Mechanisms and consequences of ATMIN repression in hypoxic conditions: roles for p53 and HIF-1                                                     | <i>Sci Rep</i>                    | 0   | RKO                                    | p53, HIF1 $\alpha$ , ATMIN                |            |
| Alnasser, H. et al.        | 2016 | Requirement of clusterin expression for prosurvival autophagy in hypoxic kidney tubular epithelial cells                                           | <i>Am J Physiol Renal Physiol</i> | 1   | HKC-8                                  | Clusterin (Clu)                           |            |
| Bonnet-Magnaval, F. et al. | 2016 | Hypoxia and ER stress promote Staufen1 expression through an alternative translation mechanism                                                     | <i>Biochem Biophys Res Commun</i> | 1   | HeLa, HEK293                           | Staufen1, PERK                            |            |
| Burrows, N. et al.         | 2016 | Hypoxia-induced nitric oxide production and tumour perfusion is inhibited by pegylated arginine deiminase (ADI-PEG20)                              | <i>Sci Rep</i>                    | 1   | HCT116, UMUC3                          | ADI-PEG20, HIF1, HIF2, VEGF, mTORC1, ASS1 |            |
| Grandi, A. et al.          | 2016 | ERMP1, a novel potential oncogene involved in UPR and oxidative stress defense, is highly expressed in human cancer                                | <i>Oncotarget</i>                 | 1   | SK-BR-3, MCF7                          | ERMP1, Nrf2, HIF1 $\alpha$                |            |
| Kikuchi, D. et al.         | 2016 | CREB is activated by ER stress and modulates the unfolded protein response by regulating the expression of IRE1 $\alpha$ and PERK                  | <i>Biochem Biophys Res Commun</i> | 1   | MDA-MB231, MCF7                        | CREB, IRE1 $\alpha$ , PERK                |            |
| Liu, Y. et al.             | 2016 | XBP1 silencing decreases glioma cell viability and glycolysis possibly by inhibiting HK2 expression                                                | <i>J Neurooncol</i>               | 1   | U87, U251                              | XBP1, HK2                                 |            |
| Vandewynckel, Y. et al.    | 2016 | Placental growth factor inhibition modulates the interplay between hypoxia and unfolded protein response in hepatocellular carcinoma               | <i>BMC Cancer</i>                 | 1   | HepG2, Huh7                            | PIGF, PERK, IRE1                          |            |
| Xu, M. et al.              | 2016 | Inhibition of the mitochondrial unfolded protein response by acetylcholine alleviated hypoxia/reoxygenation-induced apoptosis of endothelial cells | <i>Cell Cycle</i>                 | 1   | HUVECs                                 | Acetylcholine, M3AChR                     |            |
| Yoo, J. et al..            | 2016 | Differential sensitivity of hepatocellular carcinoma cells to suppression of hepatocystin transcription under hypoxic conditions                   | <i>J Bioenerg Biomembr</i>        | 1   | Huh-7, SNU-761, and SNU-3058           | PRKCSH                                    |            |
| Xie, Y. et al.             | 2016 | Protective effect of mild endoplasmic reticulum stress on radiation-induced bystander effects in hepatocyte cells                                  | <i>Sci Rep</i>                    | 1.0 | HepG2, HL-7702                         | BiP-PERK-p-eIF2 $\alpha$                  |            |
| Lai, M. et al.             | 2016 | Hypoxia Induces Autophagy through Translational Up-Regulation of Lysosomal Proteins in Human Colon Cancer Cells                                    | <i>PLoS One</i>                   | 1.0 | HCT116                                 | PERK, mTOR, LC3, P62                      |            |
| Lakhter, A. et al.         | 2016 | Golgi Associated HIF1 $\alpha$ Serves as a Reserve in Melanoma Cells                                                                               | <i>J Cell Biochem</i>             | 1.0 | MEL526, PC3, HT108, RPMI 8322, MEL2664 | Golgi-associated HIF1 $\alpha$            |            |
| Chen, P. et al.            | 2017 | Amphetamines promote mitochondrial dysfunction and DNA damage in pulmonary hypertension                                                            | <i>JCI Insight</i>                | 0.5 | Human PAECs                            | Sirtuin-1, HIF                            |            |
| Costa, V. et al.           | 2017 | MiR-675-5p supports hypoxia induced epithelial to mesenchymal transition in colon cancer cells                                                     | <i>Oncotarget</i>                 | 1   | SW620                                  | miR-675-5p, DDB2, HIF                     |            |
| Foskolou, I. et al.        | 2017 | Ribonucleotide Reductase Requires Subunit Switching in Hypoxia to Maintain DNA Replication                                                         | <i>Mol Cell</i>                   | 0.1 | 2                                      | RKO                                       | RRM1/RRM2B |
| Han, J. et al.             | 2017 | Hypoxia is a Key Driver of Alternative Splicing in Human Breast Cancer Cells                                                                       | <i>Sci Rep</i>                    | 1   | MCF7, MDA-MB-231, HeLa, SKN-BE-2       | RNAseq data                               |            |

|                            |      |                                                                                                                                                               |                                 |     |   |                              |                                               |
|----------------------------|------|---------------------------------------------------------------------------------------------------------------------------------------------------------------|---------------------------------|-----|---|------------------------------|-----------------------------------------------|
| Hauth, F. et al.           | 2017 | Cell-line dependent effects of hypoxia prior to irradiation in squamous cell carcinoma lines                                                                  | <i>Clin Transl Radiat Oncol</i> | 0.1 | 1 | SKX, FaDu, UT SCC-5,         | RAD51, DNA PK, ATM                            |
| Jongen, J. et al.          | 2017 | Downregulation of DNA repair proteins and increased DNA damage in hypoxic colon cancer cells is a therapeutically exploitable vulnerability                   | <i>Oncotarget</i>               | 0.1 |   | L145, L169                   | RAD51, KU70 and RIF1, GPx2                    |
| Lutzkendorf, J. et al.     | 2017 | Resistance for Genotoxic Damage in Mesenchymal Stromal Cells Is Increased by Hypoxia but Not Generally Dependent on p53-Regulated Cell Cycle Arrest           | <i>PLoS One</i>                 | 0.5 |   | hMSCs                        | p53, p21                                      |
| Saki, M. et al.            | 2017 | EGFR Mutations Compromise Hypoxia-Associated Radiation Resistance through Impaired Replication Fork-Associated DNA Damage Repair                              | <i>Mol Cancer Res</i>           | 0.1 |   | A549, H820, HCC827, H1975    | EGFR, RAD50                                   |
| Wu, M. et al.              | 2017 | miR-25/93 mediates hypoxia-induced immunosuppression by repressing cGAS                                                                                       | <i>Nat Cell Biol</i>            | 1   |   | MCF7                         | miR25/93, cGAS, NCOA3                         |
| Zhang, H. et al.           | 2017 | Combination of betulinic acid and chidamide inhibits acute myeloid leukemia by suppression of the HIF1alpha pathway and generation of reactive oxygen species | <i>Oncotarget</i>               | 1.0 |   | Kasumi-1, HL-60, THP-1       | HIF, SOD2                                     |
| Zhao, H. et al.            | 2017 | 2-Methoxyestradiol enhances radiosensitivity in radioresistant melanoma MDA-MB-435R cells by regulating glycolysis via HIF-1alpha/PDK1 axis                   | <i>Int J Oncol</i>              | 1   |   | MDA-MB-435S                  | SOD2, HIF, VEGF, ROS                          |
| Freis, P. et al.           | 2017 | mTOR inhibitors activate PERK signaling and favor viability of gastrointestinal neuroendocrine cell lines                                                     | <i>Oncotarget</i>               | 1   |   | MCF-7                        | mTOR, PERK                                    |
| Zhou, Y. et al.            | 2017 | Downregulation of microRNA199a5p protects cardiomyocytes in cyanotic congenital heart disease by attenuating endoplasmic reticulum stress                     | <i>Mol Med Rep</i>              | 1   |   | Human cardiac myocytes       | microRNA-199a-5p, ATF6, GRP78                 |
| Yi, H. et al.              | 2017 | PERK/eIF2alpha contributes to changes of insulin signaling in HepG2 cell induced by intermittent hypoxia                                                      | <i>Life Sci</i>                 | 1   |   | HepG2                        | PERK, eIF2 $\alpha$ , insulin signalling, AKT |
| Bischoff, F. et al.        | 2017 | Identification and Functional Characterization of Hypoxia-Induced Endoplasmic Reticulum Stress Regulating lncRNA (HypERlnc) in Pericytes                      | <i>Circ Res</i>                 | 1.0 |   | Human cardiac tissue samples | HypERlnc                                      |
| Cuomo, F. et al.           | 2018 | Pro-inflammatory cytokines activate hypoxia-inducible factor 3alpha via epigenetic changes in mesenchymal stromal/stem cells                                  | <i>Sci Rep</i>                  | 1   |   | hMSCs                        | HIF3A, NF- $\kappa$ B                         |
| Eales, K. et al.           | 2018 | Verteporfin selectively kills hypoxic glioma cells through iron-binding and increased production of reactive oxygen species                                   | <i>Sci Rep</i>                  | 1   |   | U87, U343                    | YAP                                           |
| Nakamura, H. et al.        | 2018 | Differentiated embryo chondrocyte plays a crucial role in DNA damage response via transcriptional regulation under hypoxic conditions                         | <i>PLoS One</i>                 | 1   |   | HSC-2, HepG2                 | DEC1, DEC2, HIF                               |
| Yin, H. et al.             | 2018 | The involvement of regulated in development and DNA damage response 1 (REDD1) in the pathogenesis of intervertebral disc degeneration                         | <i>Exp Cell Res</i>             | 1   |   | Human NP cells               | REDD1, NF- $\kappa$ B                         |
| Anusornvongchai, T. et al. | 2018 | Palmitate deranges erythropoietin production via transcription factor ATF4 activation of unfolded protein response                                            | <i>Kidney Int</i>               | 1   |   | HepG2                        | ATF4, EPO                                     |
| Ivanova, I. et al.         | 2018 | PERK/eIF2alpha signaling inhibits HIF-induced gene expression during the unfolded protein response via YB1-dependent regulation of HIF1alpha translation      | <i>Nucleic Acids Res</i>        | 1   |   | PC-3, U2OS, MCF7, COV-434    | PERK/eIF2 $\alpha$ , HIF1, YB-1               |

|                       |      |                                                                                                                                                                             |                                     |     |   |                         |                                       |
|-----------------------|------|-----------------------------------------------------------------------------------------------------------------------------------------------------------------------------|-------------------------------------|-----|---|-------------------------|---------------------------------------|
| Xu, G. et al.         | 2018 | Autosomal dominant retinitis pigmentosa-associated gene PRPF8 is essential for hypoxia-induced mitophagy through regulating ULK1 mRNA splicing                              | <i>Autophagy</i>                    | 1   |   | HeLa                    | PRPF8, mitophagy, ULK1                |
| Tang, C. et al.       | 2018 | Montelukast inhibits hypoxia inducible factor-1alpha translation in prostate cancer cells                                                                                   | <i>Cancer Biol Ther</i>             | 1.0 |   | PC3, PC3-HRE-LUC, LNCaP | HIF, PERK, eIF2 $\alpha$              |
| Timalsina, S. et al.  | 2018 | Chemical compounds that suppress hypoxia-induced stress granule formation enhance cancer drug sensitivity of human cervical cancer HeLa cells                               | <i>J Biochem</i>                    | 0.5 |   | HeLa                    | PERK, eIF2 $\alpha$ , stress granules |
| Zhang, J. et al.      | 2018 | Secretory kinase Fam20C tunes endoplasmic reticulum redox state via phosphorylation of Ero1alpha                                                                            | <i>EMBO J</i>                       | 0.1 |   | HeLa                    | FAM20C, ERO1 $\alpha$                 |
| Bousquet, P. et al.   | 2019 | Markers of Mitochondrial Metabolism in Tumor Hypoxia, Systemic Inflammation, and Adverse Outcome of Rectal Cancer                                                           | <i>Transl Oncol</i>                 | 0.2 |   | HCT-116, HT-29, LoVo    | Inflammatory markers                  |
| Cowman, S. et al.     | 2019 | Decrease of Nibrin expression in chronic hypoxia is associated with hypoxia-induced chemoresistance in some brain tumour cells                                              | <i>BMC Cancer</i>                   | 1   |   | U87                     | MRE11/RADAD50/NBS, p53                |
| Foltyn, M. et al.     | 2019 | The physiological mTOR complex 1 inhibitor DDIT4 mediates therapy resistance in glioblastoma                                                                                | <i>Br J Cancer</i>                  | 0.1 |   | LNT-229, LN-308, G55    | mmTOR, DDIT4, TSC1/2                  |
| Giovannini, S. et al. | 2019 | Synthetic lethality between BRCA1 deficiency and poly(ADP-ribose) polymerase inhibition is modulated by processing of endogenous oxidative DNA damage                       | <i>Nucleic Acids Res</i>            | 1   |   | A2780                   | BRCA1, PARP, OGG1                     |
| Goto, T. et al.       | 2019 | WEE1 inhibition enhances sensitivity to hypoxia/reoxygenation in HeLa cells                                                                                                 | <i>J Radiat Res</i>                 | 0.1 |   | HeLa                    | WEE1, CHK1, CHK2, BRCA1               |
| Gottgens, E. et al.   | 2019 | Inhibition of CDK4/CDK6 Enhances Radiosensitivity of HPV Negative Head and Neck Squamous Cell Carcinomas                                                                    | <i>Int J Radiat Oncol Biol Phys</i> | 0.1 | 1 | UT-SCC                  | CDK4, CDK6, p16                       |
| Krokidis, M. et al.   | 2019 | Purine DNA Lesions at Different Oxygen Concentration in DNA Repair-Impaired Human Cells (EUE-siXPA)                                                                         | <i>Cells</i>                        | 1   |   | EUE-siXPA, EUE-pBD650   | XPA                                   |
| Li, M. et al.         | 2019 | Distinct APE1 Activities Affect the Regulation of VEGF Transcription Under Hypoxic Conditions                                                                               | <i>Comput Struct Biotechnol J</i>   | 1   |   | HUVEC                   | APE1, VEGF                            |
| Mongiardi, M. et al.  | 2019 | Gene expression profiling of hypoxic response in different models of senescent endothelial cells                                                                            | <i>Aging Clin Exp Res</i>           | 2   |   | HUVEC                   | RNA seq targets                       |
| Okuyama, K. et al.    | 2019 | Mieap-induced accumulation of lysosomes within mitochondria (MALM) regulates gastric cancer cell invasion under hypoxia by suppressing reactive oxygen species accumulation | <i>Sci Rep</i>                      | 1   |   | 58As9                   | Mieap, BNIP3 and BNIP3L, cathepsin D  |
| Pan, W. et al.        | 2019 | Hypoxia-induced microRNA-191 contributes to hepatic ischemia/reperfusion injury through the ZONAB/Cyclin D1 axis                                                            | <i>Cell Death Differ</i>            | 1   |   | LO2                     | microRNA-191, ZONAB/Cyclin D1         |
| Peng, M. et al.       | 2019 | Intracellular citrate accumulation by oxidized ATM-mediated metabolism reprogramming via PFKP and CS enhances hypoxic breast cancer cell invasion and metastasis            | <i>Cell Death Dis</i>               | 1   |   | BT549, Hs578T           | ATM, PFKP, AKT/ERK/MMP2/9             |
| Schmit, K. et al.     | 2019 | Characterization of the role of TMEM45A in cancer cell sensitivity to cisplatin                                                                                             | <i>Cell Death Dis</i>               | 1   |   | SQD9, Cal 27            | TMEM45A                               |
| Seong, M. et al.      | 2019 | Hypoxia-induced regulation of mTOR signaling by miR-7 targeting REDD1                                                                                                       | <i>J Cell Biochem</i>               | 1   |   | HeLa                    | REDD1, mTOR, mir-7                    |

|                             |      |                                                                                                                                                                                               |                        |     |                                     |                            |
|-----------------------------|------|-----------------------------------------------------------------------------------------------------------------------------------------------------------------------------------------------|------------------------|-----|-------------------------------------|----------------------------|
| Sun, K. et al.              | 2019 | Oxidized ATM-mediated glycolysis enhancement in breast cancer-associated fibroblasts contributes to tumor invasion through lactate as metabolic coupling                                      | <i>EBioMedicine</i>    | 1   | CAFS                                | GLUT1, PKM2, PI3K/AKT, ATM |
| Van den Bossche, J. et al.  | 2019 | In vitro study of the Polo-like kinase 1 inhibitor volasertib in non-small-cell lung cancer reveals a role for the tumor suppressor p53                                                       | <i>Mol Oncol</i>       | 0   | A549, NCI-H1975                     | p53, Plk1                  |
| Zhijia, Y. et al.           | 2019 | Hypoxia decreases macrophage glycolysis and M1 percentage by targeting microRNA-30c and mTOR in human gastric cancer                                                                          | <i>Cancer Sci</i>      | 1   | THP-1                               | miR30-c, mTOR              |
| Cao, X. et al.              | 2019 | The IRE1alpha-XBP1 pathway function in hypoxia-induced pulmonary vascular remodeling, is upregulated by quercetin, inhibits apoptosis and partially reverses the effect of quercetin in PSMCs | <i>Am J Transl Res</i> | 1   | Human PSMCs                         | Quercetin, IRE1/XBP1,      |
| Jaud, M. et al.             | 2019 | The PERK Branch of the Unfolded Protein Response Promotes DLL4 Expression by Activating an Alternative Translation Mechanism                                                                  | <i>Cancers (Basel)</i> | 1   | HeLa, NIH3T3, eIF2αS51A MEF         | PERK, DLL4                 |
| Liew, L. et al.             | 2019 | Hypoxia-Activated Prodrugs of PERK Inhibitors                                                                                                                                                 | <i>Chem Asian J</i>    | 0   | HCT116                              | PERK                       |
| Xia, Z. et al.              | 2019 | Hypoxic ER stress suppresses beta-catenin expression and promotes cooperation between the transcription factors XBP1 and HIF1alpha for cell survival                                          | <i>J Biol Chem</i>     | 1%  | RKO                                 | β-catenin, HIF1α, XBP1     |
| Xin, L. et al.              | 2019 | 4-phenylbutyric acid attenuates endoplasmic reticulum stress-mediated apoptosis and protects the hepatocytes from intermittent hypoxia-induced injury                                         | <i>Sleep Breath</i>    | 1.5 | L02                                 | PERK-eIF2α-ATF4-CHOP       |
| Bommi, P. et al.            | 2020 | NER-factor DDB2 regulates HIF1alpha and hypoxia-response genes in HNSCC                                                                                                                       | <i>Oncogene</i>        | 1   | SCC9, SCC15                         | DDB2, HIF                  |
| Curro, M. et al.            | 2020 | Hypoxia-Dependent Expression of TG2 Isoforms in Neuroblastoma Cells as Consequence of Different MYCN Amplification Status                                                                     | <i>Int J Mol Sci</i>   | 1   | SH-SY5Y                             | TG2, MYCN                  |
| Fu, Z. et al.               | 2020 | HIF-1alpha-BNIP3-mediated mitophagy in tubular cells protects against renal ischemia/reperfusion injury                                                                                       | <i>Redox Biol</i>      | 1   | HK2, CRL-2190                       | TOMM20, COX IV, BNIP3      |
| Garcia-Venzor, A. et al.    | 2020 | LncMat2B regulated by severe hypoxia induces cisplatin resistance by increasing DNA damage repair and tumor-initiating population in breast cancer cells                                      | <i>Carcinogenesis</i>  | 0.1 | MCF-7, MDA-MB-231                   | lncMat2B                   |
| Guo, Q. et al.              | 2020 | ATM-CHK2-Beclin 1 axis promotes autophagy to maintain ROS homeostasis under oxidative stress                                                                                                  | <i>EMBO J</i>          | 1.0 | H1299, HEK293T, HEK293, HeLa        | ATM-CHK2-Beclin 1          |
| Hassan Venkatesh, G. et al. | 2020 | Hypoxia increases mutational load of breast cancer cells through frameshift mutations                                                                                                         | <i>Oncoimmunology</i>  | 1   | MCF-7, MDA-MB-231                   | Gene mutations             |
| Huan, L. et al.             | 2020 | Hypoxia induced LUCAT1/PTBP1 axis modulates cancer cell viability and chemotherapy response                                                                                                   | <i>Mol Cancer</i>      | 1   | HEK-293 T, HCT-116, RKO, LoVo       | LUCAT1/PTBP1               |
| Liu, Y. et al.              | 2020 | Oroxylin A reverses hypoxia-induced cisplatin resistance through inhibiting HIF-1alpha mediated XPC transcription                                                                             | <i>Oncogene</i>        | 1   | H460, A549, 95D, PC9, HCC827, H1975 | XPC, HIF                   |
| Luo, A. et al.              | 2020 | Proteome dynamics analysis identifies functional roles of SDE2 and hypoxia in DNA damage response in prostate cancer cells                                                                    | <i>NAR Cancer</i>      | 1   | DU145, PC3                          | SDE2, CDT2, HIF, PCNA      |

|                                                            |      |                                                                                                                                           |                                   |     |                                                                 |                           |
|------------------------------------------------------------|------|-------------------------------------------------------------------------------------------------------------------------------------------|-----------------------------------|-----|-----------------------------------------------------------------|---------------------------|
| Ma, Y. et al.                                              | 2020 | Loss of heterozygosity for Kras(G12D) promotes REDD1-dependent, non-canonical glutamine metabolism in pancreatic ductal adenocarcinoma    | <i>Biochem Biophys Res Commun</i> | 1   | PDACs                                                           | KRAS, REDD1               |
| Spina, R. et al.                                           | 2020 | MCT4 regulates de novo pyrimidine biosynthesis in GBM in a lactate-independent manner                                                     | <i>Neurooncol Adv</i>             | 1   | HSR-GBM1, HSR040821                                             | MCT4                      |
| Torrise, F. et al.                                         | 2020 | SRC Tyrosine Kinase Inhibitor and X-rays Combined Effect on Glioblastoma Cell Lines                                                       | <i>Fundam Clin Pharmacol</i>      | 1   | U251-MG, U87-MG                                                 | c-SRC                     |
| Xia, X.;Wang, Q.;Ye, T.;Liu, Y.;Liu, D.;Song, S.;Zheng, C. | 2020 | NRF2/ABCB1-mediated efflux and PARP1-mediated dampening of DNA damage contribute to doxorubicin resistance in chronic hypoxic HepG2 cells | <i>Fundam Clin Pharmacol</i>      | 1   | HepG2                                                           | NRF2/ABCB1                |
| Yao, T. et al.                                             | 2020 | ALDH-1-positive cells exhibited a radioresistant phenotype that was enhanced with hypoxia in cervical cancer                              | <i>BMC Cancer</i>                 | 1   | HeLa, Siha                                                      | ALDH, CHK1                |
| Zhao, X. et al.                                            | 2020 | Long noncoding RNA NORAD regulates angiogenesis of human umbilical vein endothelial cells via miR5903p under hypoxic conditions           | <i>Mol Med Rep</i>                | 1   | HUVEC                                                           | lncRNA NORAD/miR-590-3p   |
| Diaz, M. et al.                                            | 2020 | Caveolin-1 suppresses tumor formation through the inhibition of the unfolded protein response                                             | <i>Cell Death Dis</i>             | 1   | MDA-MB-231                                                      | Caveolin-1                |
| Lee, Y. et al.                                             | 2020 | Androgen-induced expression of DRP1 regulates mitochondrial metabolic reprogramming in prostate cancer                                    | <i>Cancer Lett</i>                | 0.5 | LNCaP                                                           | DRP1                      |
| Moszynska, A. et al.                                       | 2020 | IRE1 Endoribonuclease Activity Modulates Hypoxic HIF-1alpha Signaling in Human Endothelial Cells                                          | <i>Biomolecules</i>               | 0.9 | HUVEC                                                           | IRE1, HIF1 $\alpha$       |
| Zhang, J. et al.                                           | 2020 | Endoplasmic Reticulum stress-dependent expression of ERO1L promotes aerobic glycolysis in Pancreatic Cancer                               | <i>Theranostics</i>               | 1   | AsPC-1, BxPC-3, Capan-2, CFP AC-1, MiaPaCa-2, P ANC-1, Patu8988 | ERO1L                     |
| Zheng, H. et al.                                           | 2020 | Hypoxia Induces Growth Differentiation Factor 15 to Promote the Metastasis of Colorectal Cancer via PERK-eIF2alpha Signaling              | <i>Biomed Res Int</i>             | 1.0 | HT29, SW480                                                     | GDF15, PERK/eIF2 $\alpha$ |
| Soni, H. et al.                                            | 2020 | PERK-mediated expression of peptidylglycine alpha-amidating monooxygenase supports angiogenesis in glioblastoma                           | <i>Oncogenesis</i>                | 1   | LN308, LN229                                                    | PAM, PERK, HIF            |

Table S3. Genes identified as potential links between the UPR and DDR in hypoxia

From the systematic review, a list of genes was identified as playing key roles in the hypoxia-induced UPR (coloured in green) or the hypoxia-induced DDR (blue). Each gene has previously been linked to the other stress pathway in normoxia, for example LAMP3 was highlighted in the systematic review as being involved in the hypoxic UPR, but it has also been linked to the DDR in normoxia. Conversely, JMJD2B was highlighted in the systematic review as being involved in the hypoxic DDR but has only been linked to the UPR in normoxia.

| Gene    | Regulation by the UPR                            | Oxygen concentration investigated (% O <sub>2</sub> ) | References |
|---------|--------------------------------------------------|-------------------------------------------------------|------------|
| LAMP3   | PERK/eIF2 $\alpha$ /ATF4                         | 0.1, 1.0                                              | (1–3)      |
| ULK1    | PERK/eIF2 $\alpha$ /ATF4                         | <0.02                                                 | (4)        |
| TRIB3   | PERK/eIF2 $\alpha$ /ATF4                         | 0.1 0.2, 0.5                                          | (5)        |
| CHOP    | PERK/eIF2 $\alpha$ /ATF4                         | 1.0                                                   | (1,6–14)   |
| NOXA    | PERK/eIF2 $\alpha$ /ATF4                         | 1.0                                                   | (15)       |
| NORAD   | PERK/eIF2 $\alpha$ /ATF4                         | 1.0                                                   | (16)       |
| SIAH1/2 | PERK/eIF2 $\alpha$ /ATF4 and IRE1 $\alpha$ /XBP1 | 1.0                                                   | (17–20)    |
| DYRK2   | PERK/eIF2 $\alpha$ /ATF4                         | 1.0                                                   | (18)       |
| HIPK2   | PERK/eIF2 $\alpha$ /ATF4                         | 0.2, 1.0, 2.0                                         | (17,21)    |
| CREB    | PERK/eIF2 $\alpha$ /ATF4                         | 1.0                                                   | (22)       |
| NUPR1   | PERK/eIF2 $\alpha$ /ATF4                         | 0.2                                                   | (23)       |
| NRF2    | PERK/eIF2 $\alpha$ /ATF4                         | 0, 1.0                                                | (24–28)    |
| GSK-3B  | PERK/eIF2 $\alpha$ /ATF4                         | 1.0                                                   | (29)       |
| STAU1   | PERK/eIF2 $\alpha$ /ATF4 and interacts with XBP1 | 1.0                                                   | (30)       |
| GADD45B | PERK/eIF2 $\alpha$ /ATF4                         | 1.0                                                   | (31)       |
| C-SRC   | IRE1 $\alpha$ /XBP1                              | 1.0                                                   | (32)       |
| HK2     | IRE1 $\alpha$ /XBP1                              | 1.0                                                   | (33)       |
| CAV1    | IRE1 $\alpha$ /XBP1                              | 1.0                                                   | (34)       |
| CYPB    | ATF6                                             | 0.1                                                   | (14,35)    |
| CLU     | GRP78 binding                                    | 1.0                                                   | (36)       |
| IGFBP-3 | GRP78 binding                                    | 1.0                                                   | (37)       |
| SP1     | General ER stress induced                        | 1.0                                                   | (38)       |
| Gene    | Regulation by the DDR                            | Oxygen concentration investigated (% O <sub>2</sub> ) | References |
| JMJD2B  | Activates hypoxic DDR via ATM-RAD3 pathway       | 1.0                                                   | (39)       |

## References

1. Mujcic H, Nagelkerke A, Rouschop KMA, Chung S, Chaudary N, Span PN, et al. Hypoxic activation of the PERK/eIF2 $\alpha$  arm of the unfolded protein response promotes metastasis through induction of LAMP3. *Clin Cancer Res*. 2013 Nov 15;19(22):6126–37.
2. Nagelkerke A, Sweep FCGJ, Stegeman H, Grénman R, Kaanders JHAM, Bussink J, et al. Hypoxic regulation of the PERK/ATF4/LAMP3-arm of the unfolded protein response in head and neck squamous cell carcinoma. *Head Neck*. 2015 Jun;37(6):896–905.
3. Nagelkerke A, Bussink J, Mujcic H, Wouters BG, Lehmann S, Sweep FCGJ, et al. Hypoxia stimulates migration of breast cancer cells via the PERK/ATF4/LAMP3-arm of the unfolded protein response. *Breast Cancer Res*. 2013 Jan 7;15(1):R2.
4. Schaaf MBE, Cojocari D, Keulers TG, Jutten B, Starmans MH, de Jong MC, et al. The autophagy associated gene, ULK1, promotes tolerance to chronic and acute hypoxia. *Radiother Oncol*. 2013 Sep;108(3):529–34.
5. Wennemers M, Bussink J, Scheijen B, Nagtegaal ID, van Laarhoven HW, Raleigh JA, et al. Tribbles homolog 3 denotes a poor prognosis in breast cancer and is involved in hypoxia response. *Breast Cancer Res*. 2011 Aug;13(4):R82.
6. Rouschop KM, Dubois LJ, Keulers TG, van den Beucken T, Lambin P, Bussink J, et al. PERK/eIF2 $\alpha$  signaling protects therapy resistant hypoxic cells through induction of glutathione synthesis and protection against ROS. *Proc Natl Acad Sci U S A*. 2013 Mar 19;110(12):4622–7.
7. Pi L, Li X, Song Q, Shen Y, Lu X, Di B. Knockdown of glucose-regulated protein 78 abrogates chemoresistance of hypopharyngeal carcinoma cells to cisplatin induced by unfolded protein in response to severe hypoxia. *Oncol Lett*. 2014 Mar;7(3):685–92.
8. Vandewynckel Y-P, Laukens D, Bogaerts E, Paridaens A, Van den Bussche A, Verhelst X, et al. Modulation of the unfolded protein response impedes tumor cell adaptation to proteotoxic stress: a PERK for hepatocellular carcinoma therapy. *Hepatol Int*. 2015 Jan;9(1):93–104.
9. Xu M, Bi X, He X, Yu X, Zhao M, Zang W. Inhibition of the mitochondrial unfolded protein response by acetylcholine alleviated hypoxia/reoxygenation-induced apoptosis of endothelial cells. *Cell Cycle*. 2016 May 18;15(10):1331–43.
10. Yoo J-J, Lee DH, Cho Y, Cho EJ, Lee J-H, Yu SJ, et al. Differential sensitivity of hepatocellular carcinoma cells to suppression of hepatocystin transcription under hypoxic conditions. *J Bioenerg Biomembr*. 2016 Dec;48(6):581–90.
11. Petry A, Zhang Z, Trautz B, Rieß F, Görlach A. Cross Talk Between p22phox and ATF4 in the Endothelial Unfolded Protein Response. *Antioxid Redox Signal*. 2019 Jan 1;30(1):40–55.
12. Zheng H, Wu Y, Guo T, Liu F, Xu Y, Cai S. Hypoxia Induces Growth Differentiation Factor 15 to Promote the Metastasis of Colorectal Cancer via PERK-eIF2  $\alpha$  Signaling. *BioMed Research International*. 2020 Jan 29;2020:1–12.
13. Zhang N, Ji N, Jiang W-M, Li Z-Y, Wang M, Wen J-M, et al. Hypoxia-induced autophagy promotes human prostate stromal cells survival and ER-stress. *Biochemical and Biophysical Research Communications*. 2015 Sep 4;464(4):1107–12.

14. Jeong K, Kim H, Kim K, Kim S-J, Hahn B-S, Jahng G-H, et al. Cyclophilin B is involved in p300-mediated degradation of CHOP in tumor cell adaptation to hypoxia. *Cell Death Differ.* 2014 Mar;21(3):438–50.
15. Sermeus A, Genin M, Maincent A, Fransolet M, Notte A, Leclere L, et al. Hypoxia-Induced Modulation of Apoptosis and BCL-2 Family Proteins in Different Cancer Cell Types. *PLoS One [Internet].* 2012 Nov 5 [cited 2021 Feb 21];7(11).
16. Zhao X, Wei X, Wang X, Qi G. Long non-coding RNA NORAD regulates angiogenesis of human umbilical vein endothelial cells via miR-590-3p under hypoxic conditions. *Mol Med Rep.* 2020 Jun;21(6):2560–70.
17. Moehlenbrink J, Bitomsky N, Hofmann TG. Hypoxia suppresses chemotherapeutic drug-induced p53 Serine 46 phosphorylation by triggering HIPK2 degradation. *Cancer Lett.* 2010 Jun 1;292(1):119–24.
18. Pérez M, García-Limones C, Zapico I, Marina A, Schmitz ML, Muñoz E, et al. Mutual regulation between SIAH2 and DYRK2 controls hypoxic and genotoxic signaling pathways. *J Mol Cell Biol.* 2012 Oct;4(5):316–30.
19. Adam MG, Matt S, Christian S, Hess-Stumpp H, Haegebarth A, Hofmann TG, et al. SIAH ubiquitin ligases regulate breast cancer cell migration and invasion independent of the oxygen status. *Cell Cycle.* 2015;14(23):3734–47.
20. García-Limones C, Lara-Chica M, Jiménez-Jiménez C, Pérez M, Moreno P, Muñoz E, et al. CHK2 stability is regulated by the E3 ubiquitin ligase SIAH2. *Oncogene.* 2016 Aug 18;35(33):4289–301.
21. Tong Y, Li Q-G, Xing T-Y, Zhang M, Zhang J-J, Xia Q. HIF1 regulates WSB-1 expression to promote hypoxia-induced chemoresistance in hepatocellular carcinoma cells. *FEBS Lett.* 2013 Aug 19;587(16):2530–5.
22. Kikuchi D, Tanimoto K, Nakayama K. CREB is activated by ER stress and modulates the unfolded protein response by regulating the expression of IRE1 $\alpha$  and PERK. *Biochemical and Biophysical Research Communications.* 2016 Jan 8;469(2):243–50.
23. Hamidi T, Cano CE, Grasso D, Garcia MN, Sandi MJ, Calvo EL, et al. Nupr1-Aurora Kinase A Pathway Provides Protection against Metabolic Stress-Mediated Autophagic-Associated Cell Death. *Clin Cancer Res.* 2012 Oct 1;18(19):5234–46.
24. Xia X, Wang Q, Ye T, Liu Y, Liu D, Song S, et al. NRF2/ABCB1-mediated efflux and PARP1-mediated dampening of DNA damage contribute to doxorubicin resistance in chronic hypoxic HepG2 cells. *Fundam Clin Pharmacol.* 2020 Feb;34(1):41–50.
25. Elanchezhian R, Palsamy P, Madson CJ, Mulhern ML, Lynch DW, Troia AM, et al. Low glucose under hypoxic conditions induces unfolded protein response and produces reactive oxygen species in lens epithelial cells. *Cell Death Dis.* 2012 Apr 19;3:e301.
26. Zheng X-Y, Xu J, Chen XI, Li W, Wang T-Y. Attenuation of oxygen fluctuation-induced endoplasmic reticulum stress in human lens epithelial cells. *Exp Ther Med.* 2015 Nov;10(5):1883–7.
27. Grandi A, Santi A, Campagnoli S, Parri M, Camilli ED, Song C, et al. ERMP1, a novel potential oncogene involved in UPR and oxidative stress defense, is highly expressed in human cancer. *Oncotarget.* 2016 Aug 23;7(39):63596–610.



28. Miyamoto N, Izumi H, Miyamoto R, Bin H, Kondo H, Tawara A, et al. Transcriptional regulation of activating transcription factor 4 under oxidative stress in retinal pigment epithelial ARPE-19/HPV-16 cells. *Invest Ophthalmol Vis Sci.* 2011 Mar 2;52(3):1226–34.
29. Hotokezaka Y, Katayama I, van Leyen K, Nakamura T. GSK-3 $\beta$ -dependent downregulation of  $\gamma$ -taxilin and  $\alpha$ NAC merge to regulate ER stress responses. *Cell Death Dis.* 2015 Apr;6(4):e17119–e17119.
30. Bonnet-Magnaval F, Philippe C, Van Den Berghe L, Prats H, Touriol C, Lacazette E. Hypoxia and ER stress promote Staufen1 expression through an alternative translation mechanism. *Biochem Biophys Res Commun.* 2016 Oct 14;479(2):365–71.
31. Ma D, Shen B, Seewoo V, Tong H, Yang W, Cheng X, et al. GADD45 $\beta$  induction by S-adenosylmethionine inhibits hepatocellular carcinoma cell proliferation during acute ischemia-hypoxia. *Oncotarget.* 2016 May 11;7(24):37215–25.
32. Torrisi F, Minafra L, Cammarata FP, Savoca G, Calvaruso M, Vicario N, et al. SRC Tyrosine Kinase Inhibitor and X-rays Combined Effect on Glioblastoma Cell Lines. *Int J Mol Sci.* 2020 May 30;21(11).
33. Liu Y, Hou X, Liu M, Yang Z, Bi Y, Zou H, et al. XBP1 silencing decreases glioma cell viability and glycolysis possibly by inhibiting HK2 expression. *J Neurooncol.* 2016 Feb;126(3):455–62.
34. Díaz MI, Díaz P, Bennett JC, Urra H, Ortiz R, Orellana PC, et al. Caveolin-1 suppresses tumor formation through the inhibition of the unfolded protein response. *Cell Death Dis.* 2020 Aug 3;11(8):648.
35. Jeong K, Kim K, Kim H, Oh Y, Kim S-J, Jo Y, et al. Hypoxia induces cyclophilin B through the activation of transcription factor 6 in gastric adenocarcinoma cells. *Oncol Lett.* 2015 Jun;9(6):2854–8.
36. Alnasser HA, Guan Q, Zhang F, Gleave ME, Nguan CYC, Du C. Requirement of clusterin expression for pro-survival autophagy in hypoxic kidney tubular epithelial cells. *American Journal of Physiology-Renal Physiology.* 2015 Nov 11;310(2):F160–73.
37. Grkovic S, O'Reilly VC, Han S, Hong M, Baxter RC, Firth SM. IGFBP-3 binds GRP78, stimulates autophagy and promotes the survival of breast cancer cells exposed to adverse microenvironments. *Oncogene.* 2013 May;32(19):2412–20.
38. Koizume S, Ito S, Nakamura Y, Yoshihara M, Furuya M, Yamada R, et al. Lipid starvation and hypoxia synergistically activate ICAM1 and multiple genes in an Sp1-dependent manner to promote the growth of ovarian cancer. *Mol Cancer.* 2015 Dec;14(1):77.
39. Chen L, Fu L, Kong X, Xu J, Wang Z, Ma X, et al. Jumonji domain-containing protein 2B silencing induces DNA damage response via STAT3 pathway in colorectal cancer. *British Journal of Cancer.* 2014 Feb;110(4):1014–26.
